# Supplementary material for: Association between diabetes and edentulism and their joint effects on health status in 40 low and middle-income countries
Source: HighWire-hosted journal article supplement (doi:10.1136/bmjdrc-2021-002514), 2021-10-01
Supplement: bmjdrc-2021-002514supp001_data_supplement.pdf [file bmjdrc-2021-002514supp001_data_supplement.pdf]

## APPENDIX

**Table S1** Countries included in this study and their sample sizes

| Low-income countries |        | Middle-income countries |        |
|----------------------|--------|-------------------------|--------|
| Country              | N      | Country                 | N      |
| Bangladesh           | 5,942  | Bosnia & Herzegovina    | 1,031  |
| Burkina Faso         | 4,948  | Brazil                  | 5,000  |
| Chad                 | 4,870  | China                   | 3,994  |
| Comoros              | 1,836  | Croatia                 | 993    |
| Ethiopia             | 5,089  | Czech Republic          | 949    |
| Ghana                | 4,165  | Dominican Republic      | 5,027  |
| India                | 10,687 | Estonia                 | 1,020  |
| Ivory Coast          | 3,251  | Georgia                 | 2,950  |
| Kenya                | 4,640  | Hungary                 | 1,419  |
| Laos                 | 4,988  | Kazakhstan              | 4,499  |
| Malawi               | 5,551  | Latvia                  | 929    |
| Myanmar              | 6,045  | Malaysia                | 6,145  |
| Nepal                | 8,820  | Mauritius               | 3,968  |
| Pakistan             | 6,501  | Morocco                 | 5,000  |
| Senegal              | 3,461  | Namibia                 | 4,379  |
| Vietnam              | 4,174  | Paraguay                | 5,288  |
| Zambia               | 4,165  | Philippines             | 10,083 |
| Zimbabwe             | 4,290  | Russia                  | 4,427  |
|                      |        | South Africa            | 2,629  |
|                      |        | Sri Lanka               | 6,805  |
|                      |        | Ukraine                 | 2,860  |
|                      |        | Uruguay                 | 2,996  |

**Table S2** Questions used to assess health status

|                                 |                                                                                                                                                                                                                                                                                                                                                        |
|---------------------------------|--------------------------------------------------------------------------------------------------------------------------------------------------------------------------------------------------------------------------------------------------------------------------------------------------------------------------------------------------------|
| <b>Self-care</b>                | (1) Overall in the last 30 days, how much difficulty did you have with self-care, such as washing or dressing yourself?<br>(2) In the last 30 days, how much difficulty did you have in taking care of and maintaining your general appearance (e.g. grooming, looking neat and tidy etc.)?                                                            |
| <b>Pain/discomfort</b>          | (1) Overall in the last 30 days, how much of bodily aches or pains did you have?<br>(2) In the last 30 days, how much bodily discomfort did you have?                                                                                                                                                                                                  |
| <b>Cognition</b>                | (1) Overall in the last 30 days, how much difficulty did you have with concentrating or remembering things?<br>(2) In the last 30 days, how much difficulty did you have in learning a new task (for example, learning how to get to a new place, learning a new game, learning a new recipe etc.)?                                                    |
| <b>Interpersonal activities</b> | (1) Overall in the last 30 days, how much difficulty did you have with personal relationship or participation in the community?<br>(2) In the last 30 days, how much difficulty did you have in dealing with conflicts and tensions with others?                                                                                                       |
| <b>Sleep/energy</b>             | (1) Overall in the last 30 days, how much of a problem did you have with sleeping, such as falling asleep, waking up frequently during the night or waking up too early in the morning?<br>(2) In the last 30 days, how much of a problem did you have due to not feeling rested and refreshed during the day (e.g. feeling tired, not having energy)? |
| <b>Affect</b>                   | (1) Overall in the last 30 days, how much of a problem did you have with feeling sad, low or depressed?<br>(2) Overall in the last 30 days, how much of a problem did you have with worry or anxiety?                                                                                                                                                  |
| <b>Perceived stress</b>         | (1) How often have you felt that you were unable to control the important things in your life?<br>(2) How often have you found that you could not cope with all the things that you had to do?                                                                                                                                                         |
